# Supplementary material for: High Prevalence of ESBL and Plasmid-Mediated Quinolone Resistance Genes in Salmonella enterica Isolated from Retail Meats and Slaughterhouses in Egypt
Source: MDPI journal article supplement (doi:10.3390/antibiotics10070881), 2021-07-20
Supplement: s1 [file s1]

**Table S1.** Prevalence of *Salmonella enterica* serovars isolated from retail meats and beef carcasses in Egypt

| <i>S. enterica</i><br>serovar | Samples               |                 |                    | Total<br>(400) |
|-------------------------------|-----------------------|-----------------|--------------------|----------------|
|                               | Chicken meat<br>(160) | Beef meat (120) | Beef carcass (120) |                |
| Infantis                      | 6 (3.75%)             | 1 (0.83%)       | 3 (2.50%)          | 10 (2.5%)      |
| Typhimurium                   | 2 (1.25%)             | 2 (1.67%)       | 3 (2.50%)          | 7 (1.8%)       |
| Enteritidis                   | 3 (1.88%)             | 0.00%           | 1 (0.83%)          | 4 (1%)         |
| Virchow                       | 1 (0.63%)             | 1 (0.83%)       | 2 (1.67%)          | 4 (1%)         |
| Heidelberg                    | 3 (1.88%)             | 0.00%           | 0.00%              | 3 (0.8%)       |
| Kentucky                      | 2 (1.25%)             | 0.00%           | 0.00%              | 2 (0.5%)       |
| Anatum                        | 1 (0.63%)             | 0.00%           | 0.00%              | 1 (0.3%)       |
| Agona                         | 1 (0.63%)             | 0.00%           | 0.00%              | 1 (0.3%)       |
| Montevideo                    | 0.00%                 | 0.00%           | 1 (0.83%)          | 1 (0.3%)       |
| Stanley                       | 0.00%                 | 0.00%           | 1 (0.83%)          | 1 (0.3%)       |
| Total                         | 19 (11.88)            | 4 (3.33%)       | 11 (9.17)          | 34 (8.5%)      |

**Table S2.** Resistance phenotypes of *Salmonella enterica* isolated from retail meats and beef carcasses in Egypt

| Antimicrobials tested <sup>a</sup> | Number (%) of resistant isolates<br><i>Salmonella</i> (n=34) |
|------------------------------------|--------------------------------------------------------------|
| β-lactams                          |                                                              |
| AMC                                | 17 (50%)                                                     |
| AMP                                | 32 (94.1%)                                                   |
| ATM                                | 21 (61.8%)                                                   |
| CAZ                                | 11 (32.4%)                                                   |
| CPD                                | 12 (35.3%)                                                   |
| CRO                                | 7 (20.6%)                                                    |
| CTT                                | 26 (76.5%)                                                   |
| CTX                                | 13 (38.2%)                                                   |
| FOX                                | 23 (67.6%)                                                   |
| OXA                                | 28 (82.4%)                                                   |
| ESBL phenotype                     | 14 (41.2%)                                                   |
| Aminoglycosides                    |                                                              |
| GEN                                | 19 (55.9%)                                                   |
| STR                                | 29 (85.3%)                                                   |
| Quinolones and fluoroquinolone     |                                                              |
| CIP                                | 9 (26.5%)                                                    |
| NAL                                | 24 (70.5%)                                                   |
| Potentiated sulfonamides           |                                                              |
| SXT                                | 24 (70.5%)                                                   |
| Phenicol                           |                                                              |
| CHL                                | 26 (76.5%)                                                   |
| Tetracycline                       |                                                              |
| TET                                | 27 (79.4%)                                                   |

<sup>a</sup> AMC, amoxicillin-clavulanic acid; AMP, ampicillin; ATM, aztreonam; CHL, chloramphenicol; CIP, ciprofloxacin; CAZ, ceftazidime; CPD, cefpodoxime; CRO, ceftriaxone; CTT, cefotetan; CTX, cefotaxime; ESBL, extended-spectrum β-lactamase; FOX, ceftazidime; GEN, gentamicin; NAL, nalidixic acid; OXA, oxacillin; STR, streptomycin; SXT, sulfamethoxazole-trimethoprim; TET, tetracycline.

**Table S3.** The sources of resistance phenotypes of *Salmonella enterica* isolated from retail meats and beef carcasses in Egypt

| Antimicrobials tested    |                        | Number (%) of resistant isolates <sup>a</sup> |                    |                        | Number (%) of resistant isolates<br>(n=34) |            |
|--------------------------|------------------------|-----------------------------------------------|--------------------|------------------------|--------------------------------------------|------------|
|                          |                        | Chicken meat<br>(n=19)                        | Beef meat<br>(n=4) | Beef carcass<br>(n=11) |                                            |            |
| β-lactams                |                        |                                               |                    |                        |                                            |            |
|                          | AMC                    | 13 (68.4%)                                    | 2 (50%)            | 2 (18.2%)              | 17 (50%)                                   |            |
|                          | AMP                    | 18 (94.7%)                                    | 4 (100%)           | 10 (90.9%)             | 32 (94.1%)                                 |            |
|                          | ATM                    | 13 (68.4%)                                    | 3 (75%)            | 5 (45.5%)              | 21 (61.8%)                                 |            |
|                          | CAZ                    | 9 (47.4%)                                     | 1 (25%)            | 1 (9.1%)               | 11 (32.4%)                                 |            |
|                          | CPD                    | 10 (52.6%)                                    | 1 (25%)            | 1 (9.1%)               | 12 (35.3%)                                 |            |
|                          | CRO                    | 6 (31.6%)                                     | 1 (25%)            | 0 (0%)                 | 7 (20.6%)                                  |            |
|                          | CTT                    | 16 (84.2%)                                    | 4 (100%)           | 6 (54.5%)              | 26 (76.5%)                                 |            |
|                          | CTX                    | 11 (57.9%)                                    | 1 (25%)            | 1 (9.1%)               | 13 (38.2%)                                 |            |
|                          | FOX                    | 15 (78.9%)                                    | 3 (75%)            | 5 (45.5%)              | 23 (67.6%)                                 |            |
|                          | OXA                    | 17 (89.5%)                                    | 4 (100%)           | 7                      | 28 (82.4%)                                 |            |
|                          | ESBL phenotype         | 12 (63.2%)                                    | 1 (25%)            | 1 (9.1%)               | 14 (41.2%)                                 |            |
| Aminoglycosides          |                        |                                               |                    |                        |                                            |            |
|                          | GEN                    | 13 (68.4)                                     | 2 (50%)            | 4 (36.4%)              | 19 (55.9%)                                 |            |
|                          | STR                    | 17 (89.5%)                                    | 4 (100%)           | 8 (72.7%)              | 29 (85.3%)                                 |            |
| Quinolones               | and<br>fluoroquinolone |                                               |                    |                        |                                            |            |
|                          |                        | CIP                                           | 8 (42.1%)          | 1 (25%)                | 0 (0%)                                     | 9 (26.5%)  |
|                          |                        | NAL                                           | 14 (73.7%)         | 2 (50%)                | 8 (72.7%)                                  | 24 (70.5%) |
| Potentiated sulfonamides |                        |                                               |                    |                        |                                            |            |
|                          | SXT                    | 15 (78.9%)                                    | 4 (100%)           | 4 (36.4%)              | 24 (70.5%)                                 |            |
| Phenicols                |                        |                                               |                    |                        |                                            |            |
|                          | CHL                    | 16 (84.2%)                                    | 3 (75%)            | 7 (63.6%)              | 26 (76.5%)                                 |            |
| Tetracycline             |                        |                                               |                    |                        |                                            |            |
|                          | TET                    | 17 (89.5%)                                    | 4 (100%)           | 6 (54.5%)              | 27 (79.4%)                                 |            |

<sup>a</sup> n= Number of *S. enterica* isolates

**Table S4.** Comparison between the prevalence rates of resistance phenotypes and genes in *Salmonella enterica* isolated from retail meats and beef carcasses in 2010 and 2020 from Egypt

| Criterion <sup>a</sup>         | 2010  | 2020  |
|--------------------------------|-------|-------|
| MDR <i>Salmonella enterica</i> | 69.8% | 82.4% |
| ESBL phenotype                 | 17%   | 41.2% |
| Beta-Lactamase-encoding genes  | 75.5% | 91.2% |
| <i>bla</i> <sub>CTX-M</sub>    | 11.3% | 32.4% |
| <i>bla</i> <sub>SHV</sub>      | 7.5%  | 14.7% |
| <i>bla</i> <sub>CMY</sub>      | 11.3% | 26.5% |
| <i>bla</i> <sub>TEM</sub>      | 41.5% | 79.4  |
| <i>bla</i> <sub>OXA</sub>      | 3.7%  | 29.4% |
| PMQR genes                     | 28.3% | 67.6% |
| <i>qnrA</i>                    | 1.9%  | 5.9%  |
| <i>qnrB</i>                    | 11.2% | 23.5% |
| <i>qnrS</i>                    | 5.7%  | 35.3% |
| <i>aac(6')-Ib-cr</i>           | 9.4%  | 20.6% |

<sup>a</sup> MDR, multidrug-resistant; ESBL, extended-spectrum  $\beta$ -lactamase; PMQR, plasmid-mediated quinolone resistance

**Table S5.** Results of conjugation experiments and plasmid replicon typing for *Salmonella enterica* isolated from retail meats and beef carcasses in Egypt.

| No. | Isolate | Serovar               | Resistance gene(s)                                                                                                                                             | Plasmid replicon | Conjugable | Transconjugant resistance genotype                                                                                              |
|-----|---------|-----------------------|----------------------------------------------------------------------------------------------------------------------------------------------------------------|------------------|------------|---------------------------------------------------------------------------------------------------------------------------------|
| 1   | SI-CM1  | <i>S. Infantis</i>    | <i>bla</i> <sub>TEM-1</sub> , <i>bla</i> <sub>CTX-M-1</sub> , <i>bla</i> <sub>CMY-2</sub> , <i>bla</i> <sub>OXA-1</sub> , <i>qnrB</i> , <i>aac</i> (6')-Ib-cr  | I1               | Yes        | <i>bla</i> <sub>TEM-1</sub> , <i>bla</i> <sub>CTX-M-1</sub> , <i>bla</i> <sub>CMY-2</sub> , <i>qnrB</i> , <i>aac</i> (6')-Ib-cr |
| 2   | SI-CM2  | <i>S. Infantis</i>    | <i>bla</i> <sub>TEM-1</sub> , <i>bla</i> <sub>SHV-12</sub>                                                                                                     | HI1              | Yes        | <i>bla</i> <sub>TEM-1</sub> , <i>bla</i> <sub>SHV-12</sub>                                                                      |
| 3   | SI-CM3  | <i>S. Infantis</i>    | <i>bla</i> <sub>TEM-1</sub> , <i>bla</i> <sub>CTX-M-14</sub> , <i>bla</i> <sub>CMY-2</sub>                                                                     | I1               | Yes        | <i>bla</i> <sub>TEM-1</sub> , <i>bla</i> <sub>CTX-M-14</sub> , <i>bla</i> <sub>CMY-2</sub>                                      |
| 4   | SI-CM4  | <i>S. Infantis</i>    | <i>bla</i> <sub>OXA-1</sub>                                                                                                                                    | I1               | No         | -                                                                                                                               |
| 5   | SI-CM5  | <i>S. Infantis</i>    | <i>bla</i> <sub>TEM-1</sub> , <i>qnrS</i>                                                                                                                      | HI2              | Yes        | <i>bla</i> <sub>TEM-1</sub> , <i>qnrS</i>                                                                                       |
| 6   | SI-CM6  | <i>S. Infantis</i>    | <i>bla</i> <sub>CMY-2</sub>                                                                                                                                    | I1               | No         | -                                                                                                                               |
| 7   | SI-BM1  | <i>S. Infantis</i>    | <i>bla</i> <sub>TEM-1</sub>                                                                                                                                    | A/C              | Yes        | <i>bla</i> <sub>TEM-1</sub>                                                                                                     |
| 8   | SI-BC1  | <i>S. Infantis</i>    | <i>bla</i> <sub>TEM-1</sub> , <i>qnrB</i>                                                                                                                      | N                | Yes        | <i>bla</i> <sub>TEM-1</sub> , <i>qnrB</i>                                                                                       |
| 9   | SI-BC2  | <i>S. Infantis</i>    | <i>bla</i> <sub>OXA-1</sub>                                                                                                                                    | A/C              | No         | -                                                                                                                               |
| 10  | SI-BC3  | <i>S. Infantis</i>    | <i>bla</i> <sub>TEM-1</sub> , <i>qnrS</i>                                                                                                                      | HI1              | Yes        | <i>bla</i> <sub>TEM-1</sub> , <i>qnrS</i>                                                                                       |
| 11  | ST-CM1  | <i>S. Typhimurium</i> | <i>bla</i> <sub>TEM-1</sub> , <i>bla</i> <sub>CTX-M-15</sub> , <i>bla</i> <sub>CMY-2</sub> , <i>bla</i> <sub>OXA-1</sub> , <i>qnrB</i> , <i>aac</i> (6')-Ib-cr | A/C              | Yes        | <i>bla</i> <sub>TEM-1</sub> , <i>bla</i> <sub>CTX-M-15</sub> , <i>bla</i> <sub>CMY-2</sub> , <i>aac</i> (6')-Ib-cr              |
| 12  | ST-CM2  | <i>S. Typhimurium</i> | <i>bla</i> <sub>TEM-1</sub> , <i>bla</i> <sub>CTX-M-3</sub> , <i>bla</i> <sub>SHV-12</sub> , <i>qnrB</i>                                                       | I1               | Yes        | <i>bla</i> <sub>TEM-1</sub> , <i>bla</i> <sub>CTX-M-3</sub> , <i>bla</i> <sub>SHV-12</sub> , <i>qnrB</i>                        |
| 13  | ST-BM1  | <i>S. Typhimurium</i> | <i>bla</i> <sub>TEM-1</sub>                                                                                                                                    | A/C              | No         | -                                                                                                                               |
| 14  | ST-BM2  | <i>S. Typhimurium</i> | <i>bla</i> <sub>TEM-1</sub> , <i>bla</i> <sub>CTX-M-14</sub> , <i>bla</i> <sub>OXA-1</sub> , <i>qnrS</i>                                                       | HI2              | Yes        | <i>bla</i> <sub>TEM-1</sub> , <i>bla</i> <sub>CTX-M-14</sub> , <i>qnrS</i>                                                      |
| 15  | ST-BC1  | <i>S. Typhimurium</i> | <i>bla</i> <sub>TEM-1</sub> , <i>bla</i> <sub>CTX-M-13</sub> , <i>qnrS</i>                                                                                     | HI1              | Yes        | <i>bla</i> <sub>TEM-1</sub> , <i>bla</i> <sub>CTX-M-13</sub> , <i>qnrS</i>                                                      |
| 16  | ST-BC2  | <i>S. Typhimurium</i> | <i>bla</i> <sub>TEM-1</sub> , <i>qnrA</i>                                                                                                                      | N                | No         | -                                                                                                                               |
| 17  | ST-BC3  | <i>S. Typhimurium</i> | <i>bla</i> <sub>TEM-1</sub> , <i>qnrS</i>                                                                                                                      | I1               | Yes        | <i>bla</i> <sub>TEM-1</sub> , <i>qnrS</i>                                                                                       |
| 18  | SE-CM1  | <i>S. Enteritidis</i> | <i>bla</i> <sub>TEM-1</sub> , <i>bla</i> <sub>CTX-M-3</sub> , <i>bla</i> <sub>CMY-2</sub> , <i>bla</i> <sub>OXA-1</sub> , <i>qnrB</i> , <i>aac</i> (6')-Ib-cr  | N                | Yes        | <i>bla</i> <sub>TEM-1</sub> , <i>bla</i> <sub>CTX-M-3</sub> , <i>bla</i> <sub>CMY-2</sub> , <i>qnrB</i> , <i>aac</i> (6')-Ib-cr |
| 19  | SE-CM2  | <i>S. Enteritidis</i> | <i>bla</i> <sub>TEM-1</sub> , <i>bla</i> <sub>CTX-M-15</sub> , <i>qnrS</i>                                                                                     | A/C              | Yes        | <i>bla</i> <sub>TEM-1</sub> , <i>bla</i> <sub>CTX-M-15</sub>                                                                    |
| 20  | SE-CM3  | <i>S. Enteritidis</i> | <i>bla</i> <sub>TEM-1</sub> , <i>bla</i> <sub>SHV-12</sub> , <i>qnrS</i>                                                                                       | HI2              | Yes        | <i>bla</i> <sub>TEM-1</sub> , <i>bla</i> <sub>SHV-12</sub> , <i>qnrS</i>                                                        |
| 21  | SE-BC1  | <i>S. Enteritidis</i> | <i>bla</i> <sub>OXA-1</sub> , <i>bla</i> <sub>CMY-2</sub>                                                                                                      | N                | No         | -                                                                                                                               |

|    |         |               |                                                                                                                                                                |     |     |                                                                                                                                        |
|----|---------|---------------|----------------------------------------------------------------------------------------------------------------------------------------------------------------|-----|-----|----------------------------------------------------------------------------------------------------------------------------------------|
| 22 | SV-CM1  | S. Virchow    | <i>bla</i> <sub>TEM-1</sub> , <i>bla</i> <sub>CTX-M-15</sub> , <i>aac</i> (6')-Ib-cr                                                                           | A/C | Yes | <i>bla</i> <sub>TEM-1</sub> , <i>bla</i> <sub>CTX-M-15</sub> , <i>aac</i> (6')-Ib-cr                                                   |
| 23 | SV-BM1  | S. Virchow    | <i>bla</i> <sub>TEM-1</sub> , <i>qnrS</i>                                                                                                                      | N   | Yes | <i>bla</i> <sub>TEM-1</sub> , <i>qnrS</i>                                                                                              |
| 24 | SV-BC1  | S. Virchow    | <i>bla</i> <sub>TEM-1</sub> , <i>bla</i> <sub>OXA-1</sub> , <i>bla</i> <sub>CMY-2</sub>                                                                        | HI1 | Yes | <i>bla</i> <sub>TEM-1</sub> , <i>bla</i> <sub>CMY-2</sub>                                                                              |
| 25 | SV-BC2  | S. Virchow    | <i>qnrB</i>                                                                                                                                                    | I1  | Yes | <i>qnrB</i>                                                                                                                            |
| 26 | SH-CM1  | S. Heidelberg | <i>bla</i> <sub>TEM-1</sub> , <i>bla</i> <sub>CTX-M-2</sub> , <i>bla</i> <sub>CMY-2</sub> , <i>bla</i> <sub>SHV-12</sub> , <i>qnrB</i>                         | A/C | Yes | <i>bla</i> <sub>TEM-1</sub> , <i>bla</i> <sub>CTX-M-2</sub> , <i>bla</i> <sub>CMY-2</sub> , <i>bla</i> <sub>SHV-12</sub> , <i>qnrB</i> |
| 27 | SH-CM2  | S. Heidelberg | <i>bla</i> <sub>TEM-1</sub> , <i>bla</i> <sub>CMY-2</sub>                                                                                                      | I1  | Yes | <i>bla</i> <sub>TEM-1</sub> , <i>bla</i> <sub>CMY-2</sub>                                                                              |
| 28 | SH-CM3  | S. Heidelberg | <i>bla</i> <sub>TEM-1</sub> , <i>qnrB</i>                                                                                                                      | N   | No  | -                                                                                                                                      |
| 29 | SK-CM1  | S. Kentucky   | <i>bla</i> <sub>TEM-1</sub> , <i>bla</i> <sub>CTX-M-15</sub> , <i>bla</i> <sub>CMY-2</sub> , <i>bla</i> <sub>OXA-1</sub> , <i>qnrS</i> , <i>aac</i> (6')-Ib-cr | L/M | Yes | <i>bla</i> <sub>TEM-1</sub> , <i>bla</i> <sub>CTX-M-15</sub> , <i>bla</i> <sub>CMY-2</sub> , <i>qnrS</i> , <i>aac</i> (6')-Ib-cr       |
| 30 | SK-CM2  | S. Kentucky   | <i>bla</i> <sub>TEM-1</sub> , <i>bla</i> <sub>SHV-12</sub> , <i>aac</i> (6')-Ib-cr                                                                             | I1  | Yes | <i>bla</i> <sub>TEM-1</sub> , <i>bla</i> <sub>SHV-12</sub> , <i>aac</i> (6')-Ib-cr                                                     |
| 31 | SAN-CM1 | S. Anatum     | <i>bla</i> <sub>OXA-1</sub> , <i>qnrS</i>                                                                                                                      | A/C | Yes | <i>qnrS</i>                                                                                                                            |
| 32 | SAG-CM1 | S. Agona      | <i>qnrA</i>                                                                                                                                                    | N   | No  | -                                                                                                                                      |
| 33 | SM-BC1  | S. Montevideo | <i>bla</i> <sub>TEM-1</sub> , <i>qnrS</i>                                                                                                                      | HI1 | Yes | <i>bla</i> <sub>TEM-1</sub> , <i>qnrS</i>                                                                                              |
| 34 | SS-BC1  | S. Stanley    | <i>qnrS</i>                                                                                                                                                    | HI2 | Yes | <i>qnrS</i>                                                                                                                            |

---

Table S6. Numbers and sources of meat samples used in this study

| Products        | No. samples | Source                         |
|-----------------|-------------|--------------------------------|
| 1- Chicken meat |             |                                |
| a- Breast       | 80          | street vendors, retail markets |
| b- Legs         | 80          | street vendors, retail markets |
| Total           | 160         |                                |
| 2- Beef meat    |             |                                |
| a- Frozen       | 80          | street vendors, retail markets |
| b- Fresh        | 40          | butchers                       |
| Total           | 120         |                                |
| 3- Beef carcass | 120         | swabs from slaughterhouses     |
| Total           | 400         |                                |

Table S7. City names and numbers of meat samples collected from four governorates (Dakahlia, Damietta, Gharbia and Kafr El-Sheikh) in Egypt

| Dakahlia           |                  | Damietta           |                  | Gharbia                |                  | Kafr El-Sheikh    |                  |
|--------------------|------------------|--------------------|------------------|------------------------|------------------|-------------------|------------------|
| City name          | No. <sup>a</sup> | City name          | No. <sup>a</sup> | City name              | No. <sup>a</sup> | City name         | No. <sup>a</sup> |
| 1. Aga             | 10               | 1. Al Zarqa        | 10               | 1. Al Santa            | 10               | 1. Baltim         | 10               |
| 2. Al Manzalah     | 10               | 2. Al Sarou        | 10               | 2. Basioun             | 10               | 2. Biyala         | 10               |
| 3. Belkas          | 10               | 3. Damietta        | 10               | 3. El Mahalla El Kubra | 20               | 3. Desouk         | 10               |
| 4. Dekernes        | 10               | 4. El-Rawda        | 10               | 4. Kafr El-Zayat       | 10               | 4. El-Hamoul      | 10               |
| 5. El-Senbellawein | 10               | 5. Faraskour       | 10               | 5. Qattour             | 10               | 5. El-Reyad       | 10               |
| 6. Mansoura        | 10               | 6. Izbat Al Borg   | 10               | 6. Samannoud           | 10               | 6. Fowah          | 10               |
| 7. Mataria         | 10               | 7. Kafr Al Battikh | 10               | 7. Tanta               | 20               | 7. Kafr El Sheikh | 10               |
| 8. Nabaruh         | 10               | 8. Kafr Saad       | 10               | 8. Zefta               | 10               | 8. Metoubes       | 10               |
| 9. Sherbin         | 10               | 9. Mit Abou Ghaleb | 10               | -                      | -                | 9. Qillin         | 10               |
| 10. Talkha         | 10               | 10. Ras Elbar      | 10               | -                      | -                | 10. Sidi Salem    | 10               |
| Total              | 100              |                    | 100              | Total                  | 100              | Total             | 100              |

<sup>a</sup>No., number of meat samples collected



**Table S8.** Primers used for PCR and DNA sequencing

| Primer                     | Sequence (5' to 3') <sup>a</sup> | Annealing Temp. | Target                       | Reference |
|----------------------------|----------------------------------|-----------------|------------------------------|-----------|
| β-Lactamases               |                                  |                 |                              |           |
| TEM-F                      | ATAAAATTCTTGAAGACGAAA            | 50 °C           | <i>bla</i> <sub>TEM</sub>    | [50]      |
| TEM-R                      | GACAGTTACCAATGCTTAATC            |                 |                              |           |
| SHV-F                      | TT ATCTCCCTGTTAGCCACC            | 50 °C           | <i>bla</i> <sub>SHV</sub>    | [50]      |
| SHV-R                      | GATTTGCTGATTCGCTCGG              |                 |                              |           |
| OXA-F                      | TCAACTTTCAAGATCGCA               | 56 °C           | <i>bla</i> <sub>OXA</sub>    | [50]      |
| OXA-R                      | GTGTGTTTAGAATGGTGA               |                 |                              |           |
| CTX-M-F                    | CGCTTTGCGATGTGCAG                | 56 °C           | <i>bla</i> <sub>CTX-M</sub>  | [50]      |
| CTX-M-R                    | ACCGCGATATCGTTGGT                |                 |                              |           |
| CMY-F                      | GACAGCCTCTTTCTCCACA              | 55 °C           | <i>bla</i> <sub>CMY</sub>    | [50]      |
| CMY-R                      | TGGAACGAAGGCTACGTA               |                 |                              |           |
| Plasmid-mediated quinolone |                                  |                 |                              | [50]      |
| qnrA-F                     | ATTTCTCACGCCAGGATTG              | 53 °C           | <i>qnrA</i>                  | [50]      |
| qnrA-R                     | GATCGGCAAAGGTTAGGTCA             |                 |                              |           |
| qnrB-F                     | GATCGTGAAAGCCAGAAAGG             | 53 °C           | <i>qnrB</i>                  | [50]      |
| qnrB-R                     | ACGATGCCTGGTAGTTGTCC             |                 |                              |           |
| qnrS-F                     | ACGACATTCGTCAACTGCAA             | 53 °C           | <i>qnrS</i>                  | [50]      |
| qnrS-R                     | TAAATTGGCACCCCTGTAGGC            |                 |                              |           |
| aac(6′)-Ib-F               | TTGCGATGCTCTATGAGTGGCTA          | 55 °C           | <i>aac(6′)-Ib-cr</i>         | [50]      |
| aac(6′)-Ib-R               | CTCGAATGCCTGGCGTGTTT             |                 |                              |           |
| Carbapenemases             |                                  |                 |                              |           |
| IMP-F                      | GGAATAGAGTGGCTTAAYTCTC           | 52 °C           | <i>bla</i> <sub>IMP</sub>    | [51]      |
| IMP-R                      | GGTTTAAAYAAAACAACCACC            |                 |                              |           |
| NDM-F                      | GGTTTGGCGATCTGGTTTTC             | 52 °C           | <i>bla</i> <sub>NDM</sub>    | [51]      |
| NDM-R                      | CGGAATGGCTCATCACGATC             |                 |                              |           |
| SPM-F                      | AAAATCTGGGTACGCAAACG             | 52 °C           | <i>bla</i> <sub>SPM</sub>    | [51]      |
| SPM-R                      | ACATTATCCGCTGGAACAGG             |                 |                              |           |
| VIM-F                      | GATGGTGTTTGGTCGCATA              | 52 °C           | <i>bla</i> <sub>VIM</sub>    | [51]      |
| VIM-R                      | CGAATGCGCAGCACCAG                |                 |                              |           |
| OXA48-F                    | GCGTGGTTAAGGATGAACAC             | 52 °C           | <i>bla</i> <sub>OXA-48</sub> | [51]      |
| OXA48-R                    | CATCAAGTTCAACCCAACCG             |                 |                              |           |
| Plasmid-replicon typing    |                                  |                 |                              |           |
| A/C-F                      | GAGAACCAAAGACAAAGACCTGGA         | 60 °C           | A/C                          | [52]      |
| A/C-R                      | ACGACAAACCTGAATTGCCTCCTT         |                 |                              |           |
| B/O-F                      | GCGGTCCGGAAGCCAGAAAAC            | 60 °C           | B/O                          | [52]      |
| B/O-R                      | TCTGCGTTCCGCCAAGTTCGA            |                 |                              |           |
| FIA-F                      | CCATGCTGGTTCTAGAGAAGGTG          | 52 °C           | FIA                          | [52]      |
| FIA-R                      | GTATATCCTTACTGGCTTCCGCAG         |                 |                              |           |
| FIC-F                      | GTGAACTGGCAGATGAGGAAGG           | 52 °C           | FIC                          | [52]      |
| FIC-R                      | TTCTCCTCGTCGCCAAACTAGAT          |                 |                              |           |
| FIIA/FIIS-F                | CTGTCGTAAGCTGATGGC               | 52 °C           | FIIA/FIIS                    | [52]      |
| FIIA/FIIS-R                | CTCTGCCACAAACTTCAGC              |                 |                              |           |
| FIB-F                      | GGAGTTCTGACACACGATTTTCTG         | 52 °C           | FIB                          | [52]      |
| FIB-R                      | CTCCCGTCGCTTCAGGGCATT            |                 |                              |           |
| HI1-F                      | GGAGCGATGGATTACTTCAGTAC          | 60 °C           | HI1                          | [52]      |
| HI1-R                      | TGCCGTTTCACCTCGTGAGTA            |                 |                              |           |
| HI2-F                      | TTTCTCCTGAGTCACCTGTTAACAC        | 60 °C           | HI2                          | [52]      |
| HI2-R                      | GGCTCACTACCGTTGTCATCCT           |                 |                              |           |
| I1-F                       | CGAAAGCCGGACGGCAGAA              | 60 °C           | I1                           | [52]      |
| I1-R                       | TCGTGCTTCCGCCAAGTTCGT            |                 |                              |           |
| K/B-F                      | GCGGTCCGGAAGCCAGAAAAC            | 60 °C           | K/B                          | [52]      |

|       |                               |       |     |      |
|-------|-------------------------------|-------|-----|------|
| K/B-R | TCTTTCACGAGCCCCGCCAAA         |       |     |      |
| L/M-F | GGATGAAAACATATCAGCATCTGAAG    | 60 °C | L/M | [52] |
| L/M-R | CTGCAGGGGCGATTCTTTAGG         |       |     |      |
| N-F   | GTCTAACGAGCTTACCGAAG          | 60 °C | N   | [52] |
| N-R   | GTTTCAACTCTGCCAAGTTC          |       |     |      |
| T-F   | TTGGCCTGTTTGTGCCTAAACCAT      | 60 °C | T   | [52] |
| T-R   | CGTTGATTACACTTAGCTTTGGAC      |       |     |      |
| W-F   | CCTAAGAACAACAAAGCCCCCG        | 60 °C | W   | [52] |
| W-R   | GGTGCGCGGCATAGAACCGT          |       |     |      |
| X-F   | AACCTTAGAGGCTATTTAAGTTGCTGAT  | 60 °C | X   | [52] |
| X-R   | TGAGAGTCAATTTTATCTCATGTTTTAGC |       |     |      |

---
